# Supplementary material for: Carbonyl scavenging and chemical chaperon like function of essential amino acids attenuates non-enzymatic glycation of albumin
Source: Royal Society of Chemistry journal article supplement (doi:10.1039/c5ra27460e), 2016-01-01
Supplement: c5ra27460e1.pdf [file c5ra27460e1.pdf]

**Supplementary data:**

Fluorescent imaging for glycated protein samples was carried out by using Carl Zeiss Confocal microscope (LSM-710). Imaging was carried out using ThT (Excitation= 445 nm and Emission= 480 nm) with protein samples (100  $\mu$ M) glycated in the presence and absence of essential amino acids.

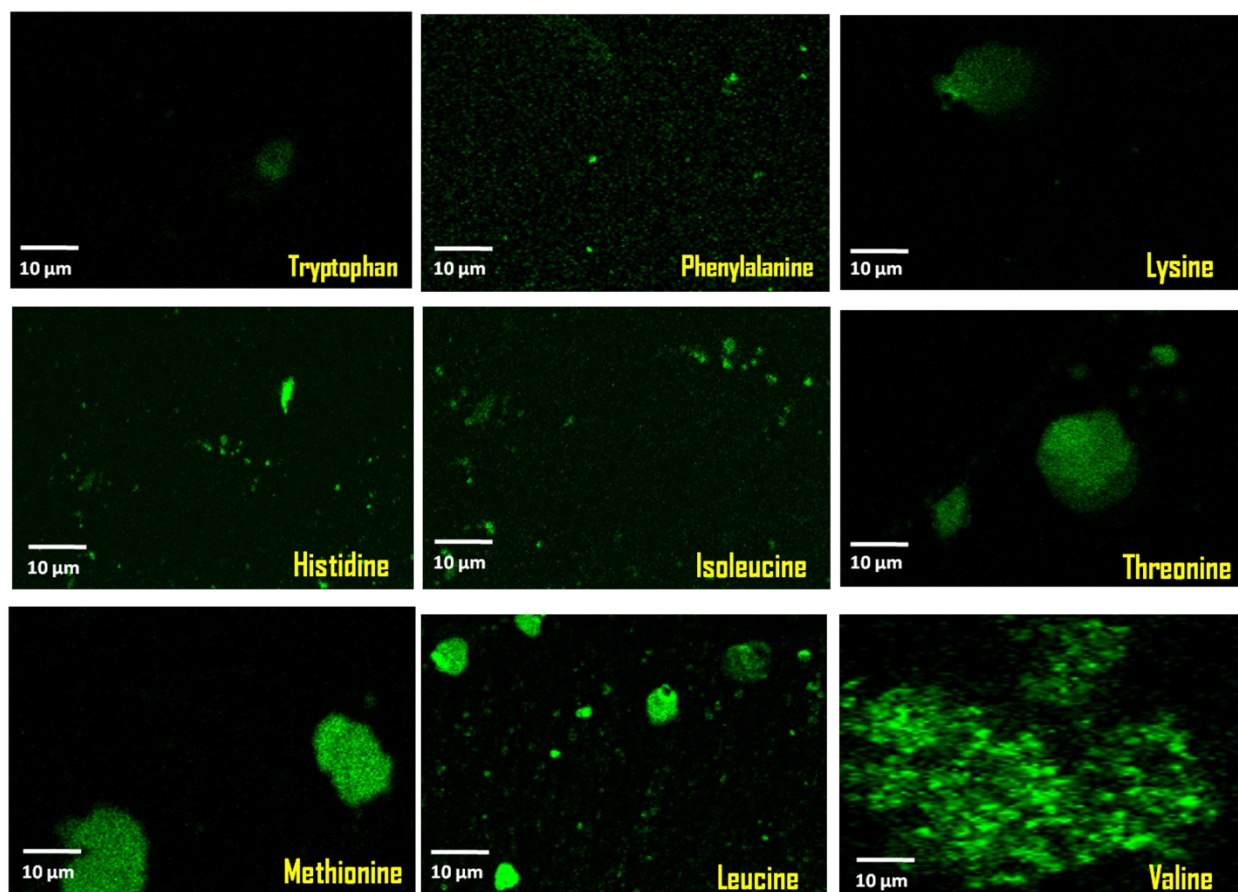

**Fig. 1** Confocal images of the glycated albumin aggregates in the presence of different essential amino acids. Thioflavin T was used as a marker for the aggregation.
